# Supplementary material for: Root and Rhizosphere Microbiome of Tomato Plants Grown in the Open Field in the South of West Siberia under Mineral Fertilization
Source: MDPI journal article supplement (doi:10.3390/horticulturae8111051), 2022-11-08
Supplement: s1 [file s1]

Archive with 1 entries (1 files):
- horticulturae-2013956-supplementary.pdf
