# Supplementary material for: Root and Rhizosphere Microbiome of Tomato Plants Grown in the Open Field in the South of West Siberia under Mineral Fertilization
Source: MDPI journal article supplement (doi:10.3390/horticulturae8111051), 2022-11-08
Supplement: s1 [file s1 › horticulturae-2013956-supplementary.pdf]

# Root and rhizosphere microbiome of tomato plants grown in the open field in the south of West Siberia under mineral fertilization

**Table S1.** Climate (as averaged 1991-2000, available online: <https://meteoinfo.ru/climatecities?p=1930>, accessed on 31 October 2022) characteristics of the region where the experiment was performed

| Month     | Average monthly air temperature, °C | Average monthly atmospheric pressure, mbar at sea level | Average monthly precipitation, mm | Number of days with precipitation $\geq 1$ mm |
|-----------|-------------------------------------|---------------------------------------------------------|-----------------------------------|-----------------------------------------------|
| May       | 12.5                                | 1014                                                    | 34                                | 7                                             |
| June      | 18.2                                | 1009                                                    | 59                                | 9                                             |
| July      | 20.2                                | 1006                                                    | 69                                | 9                                             |
| August    | 18.6                                | 1010                                                    | 53                                | 9                                             |
| September | 10.8                                | 1016                                                    | 42                                | 9                                             |

2

**Table S2.** Soil (Phaeozem) properties at the experimental site in the south of West Siberia, mean  $\pm$  standard deviation

| Soil property                                                        | No                                    | NPK                      |
|----------------------------------------------------------------------|---------------------------------------|--------------------------|
| pH                                                                   | 7.57 $\pm$ 0.06 <b>b</b> <sup>1</sup> | 7.36 $\pm$ 0.03 <b>a</b> |
| SOC <sup>2</sup> , %                                                 | 9.0 $\pm$ 0.8                         | 8.8 $\pm$ 1.0            |
| SIC, %                                                               | 0.58 $\pm$ 0.09                       | 0.53 $\pm$ 0.05          |
| STN, %                                                               | 0.53 $\pm$ 0.08                       | 0.55 $\pm$ 0.08          |
| NO <sub>3</sub> <sup>-</sup> , mg N kg <sup>-1</sup> soil            | 70 $\pm$ 12 <b>a</b>                  | 262 $\pm$ 96 <b>b</b>    |
| Available P-P <sub>2</sub> O <sub>5</sub> , mg kg <sup>-1</sup> soil | 7.0 $\pm$ 2.3                         | 6.8 $\pm$ 1.8            |
| K <sub>ex</sub> , mg kg <sup>-1</sup> soil                           | 144 $\pm$ 2 <b>a</b>                  | 171 $\pm$ 1 <b>b</b>     |
| Ca <sub>ex</sub> , g kg <sup>-1</sup> soil                           | 5.46 $\pm$ 0.31                       | 5.74 $\pm$ 0.20          |
| Mg <sub>ex</sub> , mg kg <sup>-1</sup> soil                          | 405 $\pm$ 48 <b>b</b>                 | 339 $\pm$ 57 <b>a</b>    |

<sup>1</sup> Different letters in rows indicate statistically significant difference at  $P \leq 0.05$  (Fisher's LSD test); the absence of letters indicates no differences. <sup>2</sup> Abbreviations: SOC – soil organic C, SIC – soil inorganic C, STN – soil total nitrogen, K<sub>ex</sub>, Ca<sub>ex</sub> and Mg<sub>ex</sub> refer to the elements' extractable forms and are expressed as the mass units of the respective element; No – no fertilizer, NPK – mineral fertilizer.
